# Supplementary material
Source: publisher site journal article supplement (https://www.dovepress.com/article/344723)
Supplement: Supplementary file 1 [file get_supplementary_file.php]

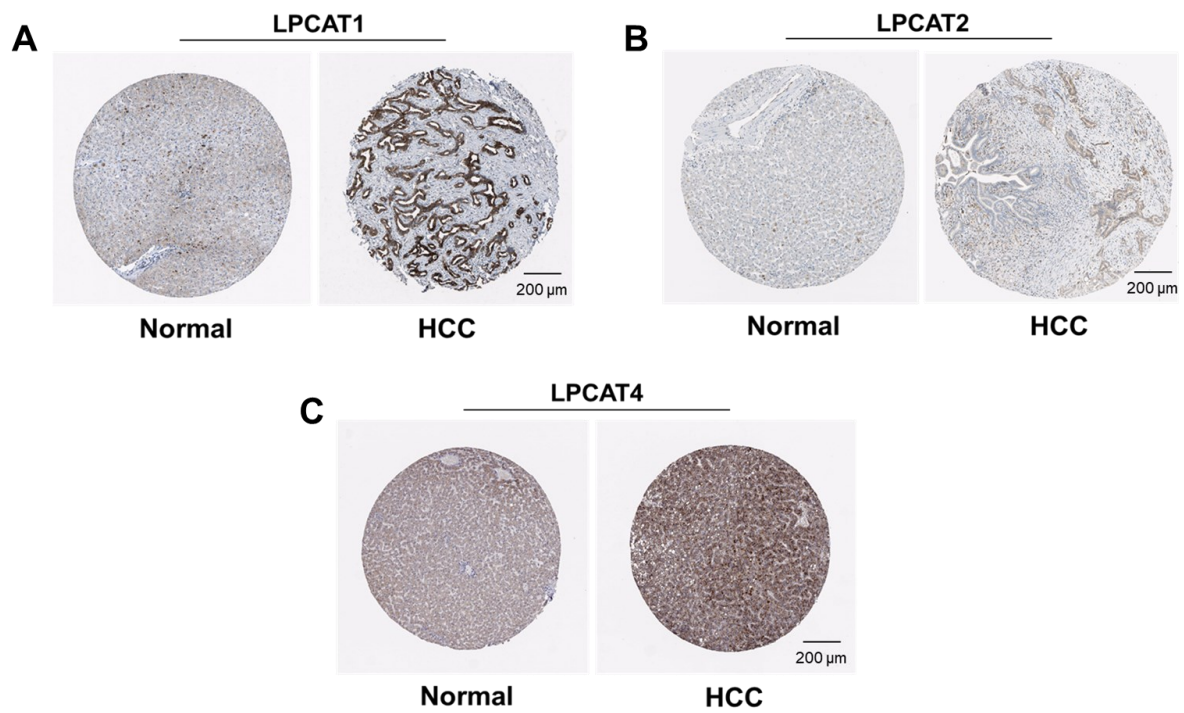

**Supplementary Figure 1** LPCAT proteins expression in normal liver and HCC specimens. The antibodies for (A) LPCAT1, (B) LPCAT2, and (C) LPCAT4 are HPA022268, HPA007891, and HPA057321 respectively. The data of LPCAT3 is still pending (HPA database).

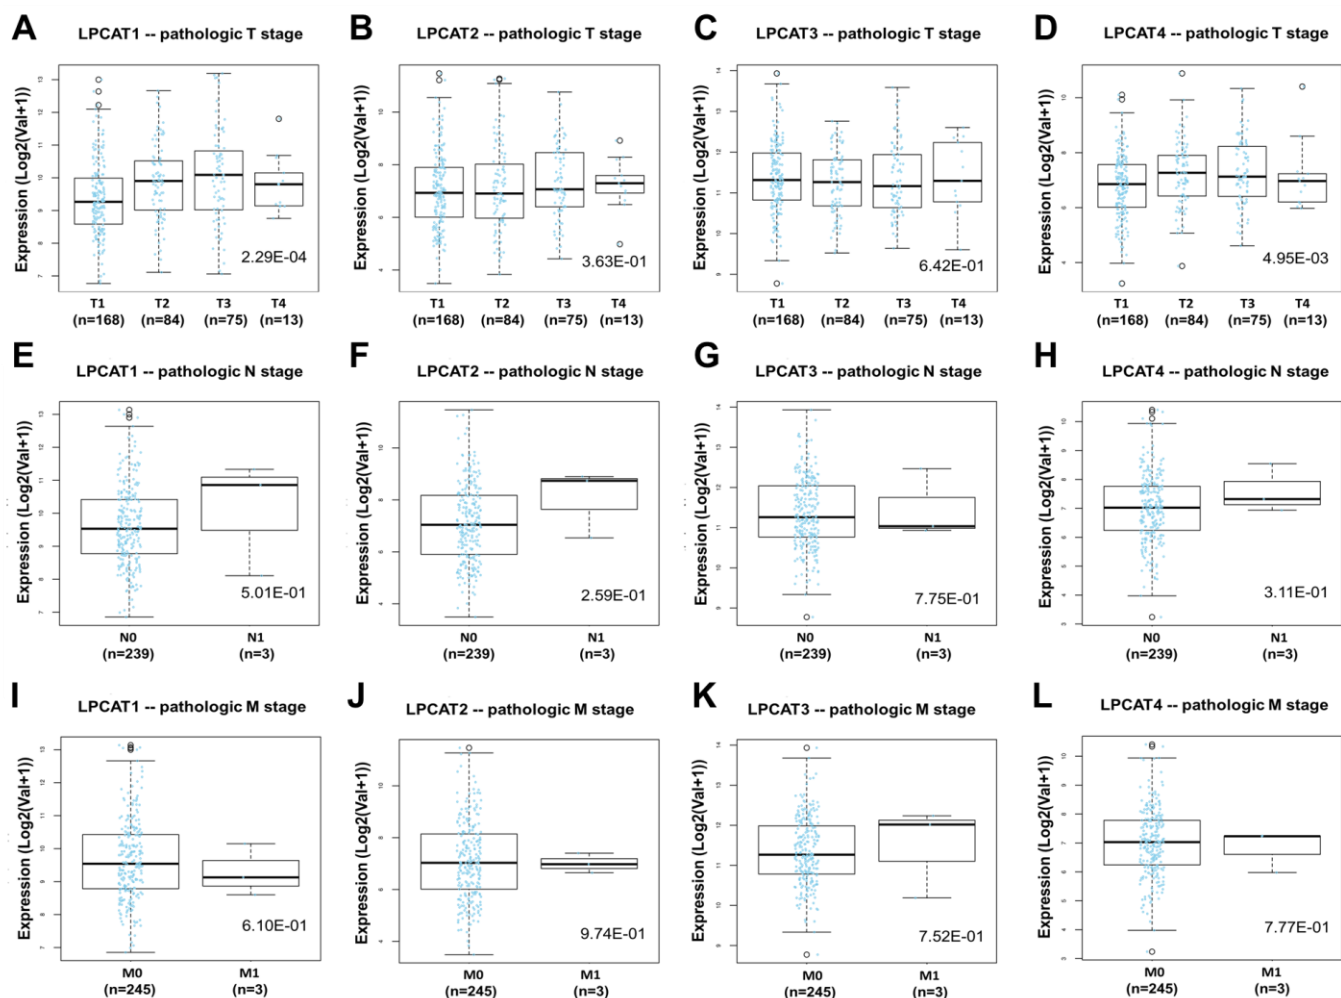

**Supplementary Figure 2** Associations between LPCATs' expression and pathologic TNM stages of HCC patients. The expression of *LPCAT1-4* in HCC patients with different (**A-D**) T stages, (**E-H**) N stages, and (**I-L**) M stages (LinkedOmics).

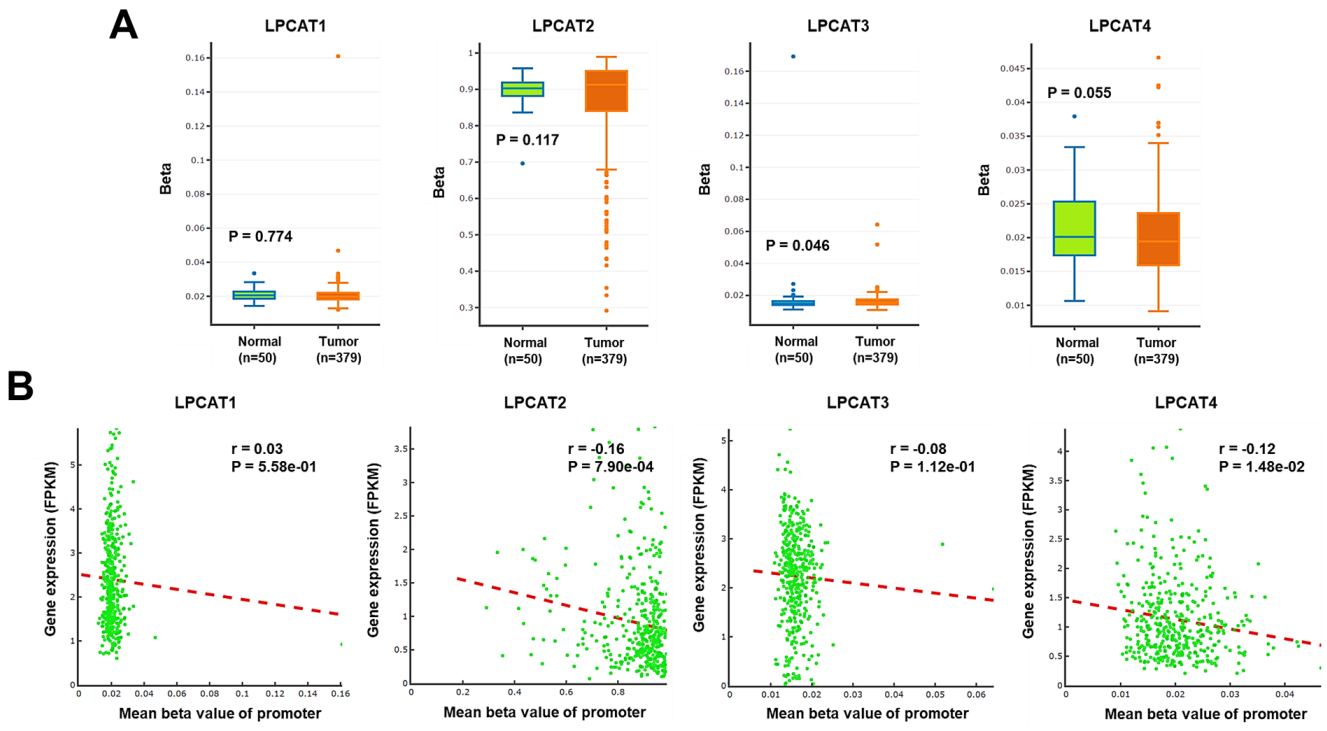

**Supplementary Figure 3** DNA methylation of LPCATs in HCC. **(A)** Global DNA methylation levels of LPCATs in HCC and normal liver samples. **(B)** Correlations between the global DNA methylation levels and expression levels of LPCATs in HCC samples (DNM1VD).

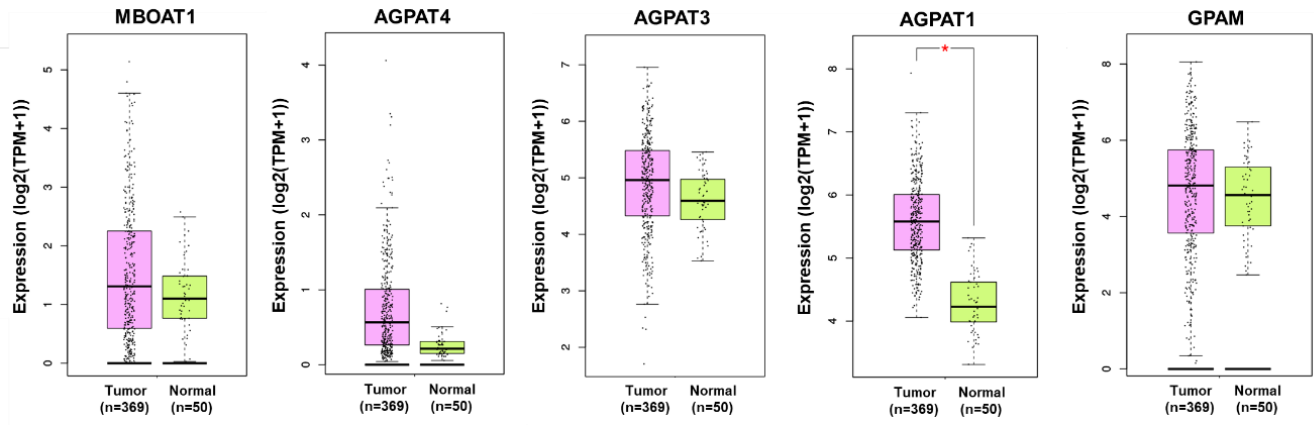

**Supplementary Figure 4** The mRNA expression of the five core genes in the PPI network in HCC (GEPIA). \* $P < 0.05$ ; TPM, transcript per million.

**Supplementary Table 1** Significantly Differential Methylation-Related Functional Elements of LPCATs in

## HCC

| Gene Symbol | CpG (probe ID) | Group   | Relation to island | Average level in tumor samples | Average level in normal samples | Delta value | Fold change | <i>P</i> value |
|-------------|----------------|---------|--------------------|--------------------------------|---------------------------------|-------------|-------------|----------------|
| LPCAT1      | cg05255351     | Body    | OpenSea            | 0.71                           | 0.67                            | 0.05        | 1.07        | 4.47E-02       |
| LPCAT1      | cg00287915     | Body    | OpenSea            | 0.71                           | 0.67                            | 0.04        | 1.06        | 3.04E-02       |
| LPCAT1      | cg09849319     | Body    | Island             | 0.81                           | 0.77                            | 0.04        | 1.05        | 1.29E-02       |
| LPCAT1      | cg07479711     | TSS1500 | S_Shore            | 0.88                           | 0.90                            | -0.02       | 0.98        | 1.69E-03       |
| LPCAT1      | cg09121930     | Body    | OpenSea            | 0.92                           | 0.95                            | -0.02       | 0.98        | 4.69E-02       |
| LPCAT1      | cg13042527     | Body    | N_Shore            | 0.92                           | 0.94                            | -0.03       | 0.97        | 1.51E-02       |
| LPCAT1      | cg25985480     | Body    | Island             | 0.92                           | 0.95                            | -0.03       | 0.97        | 1.38E-02       |
| LPCAT1      | cg17437086     | Body    | OpenSea            | 0.89                           | 0.92                            | -0.03       | 0.97        | 5.17E-03       |
| LPCAT1      | cg22938488     | Body    | OpenSea            | 0.87                           | 0.90                            | -0.03       | 0.97        | 1.33E-04       |
| LPCAT1      | cg12210878     | Body    | N_Shore            | 0.92                           | 0.95                            | -0.03       | 0.97        | 3.34E-02       |
| LPCAT1      | cg20558160     | Body    | Island             | 0.88                           | 0.92                            | -0.03       | 0.96        | 9.70E-03       |
| LPCAT1      | cg02599626     | Body    | OpenSea            | 0.86                           | 0.89                            | -0.03       | 0.96        | 3.91E-02       |
| LPCAT1      | cg21747442     | Body    | N_Shelf            | 0.89                           | 0.93                            | -0.04       | 0.96        | 2.39E-02       |
| LPCAT1      | cg05580512     | 3'UTR   | N_Shore            | 0.88                           | 0.92                            | -0.04       | 0.96        | 1.87E-02       |
| LPCAT1      | cg22305129     | Body    | Island             | 0.83                           | 0.87                            | -0.03       | 0.96        | 1.85E-02       |
| LPCAT1      | cg09485506     | Body    | OpenSea            | 0.89                           | 0.93                            | -0.04       | 0.96        | 6.83E-03       |
| LPCAT1      | cg16533510     | Body    | OpenSea            | 0.90                           | 0.94                            | -0.04       | 0.96        | 3.22E-02       |
| LPCAT1      | cg17222401     | Body    | N_Shore            | 0.87                           | 0.91                            | -0.04       | 0.96        | 6.78E-03       |
| LPCAT1      | cg06977900     | Body    | OpenSea            | 0.83                           | 0.87                            | -0.04       | 0.96        | 1.11E-03       |
| LPCAT1      | cg17265576     | Body    | OpenSea            | 0.93                           | 0.97                            | -0.04       | 0.95        | 3.04E-02       |
| LPCAT1      | cg06984201     | Body    | OpenSea            | 0.89                           | 0.93                            | -0.04       | 0.95        | 2.79E-02       |
| LPCAT1      | cg24093182     | Body    | OpenSea            | 0.90                           | 0.94                            | -0.04       | 0.95        | 1.93E-02       |
| LPCAT1      | cg18191138     | Body    | N_Shelf            | 0.94                           | 0.98                            | -0.05       | 0.95        | 4.28E-02       |
| LPCAT1      | cg14093365     | Body    | Island             | 0.86                           | 0.91                            | -0.05       | 0.95        | 6.47E-03       |
| LPCAT1      | cg08282812     | Body    | OpenSea            | 0.54                           | 0.57                            | -0.03       | 0.94        | 4.43E-02       |
| LPCAT1      | cg11468199     | Body    | OpenSea            | 0.80                           | 0.85                            | -0.05       | 0.94        | 1.49E-04       |
| LPCAT1      | cg01259891     | Body    | N_Shore            | 0.86                           | 0.92                            | -0.06       | 0.94        | 5.54E-03       |
| LPCAT1      | cg09885622     | Body    | OpenSea            | 0.74                           | 0.79                            | -0.05       | 0.94        | 4.51E-02       |
| LPCAT1      | cg26110675     | Body    | N_Shore            | 0.85                           | 0.91                            | -0.06       | 0.94        | 1.24E-03       |
| LPCAT1      | cg05538406     | Body    | OpenSea            | 0.84                           | 0.90                            | -0.06       | 0.93        | 1.62E-03       |
| LPCAT1      | cg11468635     | Body    | OpenSea            | 0.87                           | 0.93                            | -0.06       | 0.93        | 7.60E-03       |
| LPCAT1      | cg20962974     | Body    | OpenSea            | 0.70                           | 0.75                            | -0.05       | 0.93        | 1.19E-02       |
| LPCAT1      | cg02455827     | Body    | N_Shore            | 0.80                           | 0.87                            | -0.06       | 0.93        | 2.31E-05       |
| LPCAT1      | cg01900358     | Body    | OpenSea            | 0.78                           | 0.84                            | -0.06       | 0.93        | 1.05E-02       |
| LPCAT1      | cg09809922     | Body    | OpenSea            | 0.85                           | 0.91                            | -0.07       | 0.93        | 2.70E-03       |
| LPCAT1      | cg11960719     | Body    | OpenSea            | 0.79                           | 0.85                            | -0.06       | 0.93        | 1.93E-03       |
| LPCAT1      | cg26225478     | Body    | OpenSea            | 0.81                           | 0.87                            | -0.07       | 0.92        | 1.14E-03       |
| LPCAT1      | cg06859187     | 3'UTR   | Island             | 0.81                           | 0.88                            | -0.07       | 0.92        | 2.16E-05       |
| LPCAT1      | cg05681827     | Body    | OpenSea            | 0.82                           | 0.88                            | -0.07       | 0.92        | 1.09E-03       |
| LPCAT1      | cg07148919     | Body    | Island             | 0.87                           | 0.95                            | -0.07       | 0.92        | 6.78E-03       |
| LPCAT1      | cg02661034     | Body    | OpenSea            | 0.74                           | 0.80                            | -0.06       | 0.92        | 4.71E-03       |
| LPCAT1      | cg08610563     | Body    | OpenSea            | 0.82                           | 0.89                            | -0.07       | 0.92        | 5.04E-03       |
| LPCAT1      | cg12412255     | Body    | N_Shore            | 0.69                           | 0.75                            | -0.06       | 0.92        | 1.03E-03       |
| LPCAT1      | cg19101154     | TSS200  | Island             | 0.03                           | 0.03                            | 0.00        | 0.92        | 4.47E-03       |
| LPCAT1      | cg16194544     | Body    | S_Shore            | 0.78                           | 0.86                            | -0.08       | 0.91        | 3.40E-04       |
| LPCAT1      | cg16474722     | Body    | OpenSea            | 0.79                           | 0.87                            | -0.08       | 0.91        | 8.40E-05       |

|        |            |               |         |      |      |       |      |          |
|--------|------------|---------------|---------|------|------|-------|------|----------|
| LPCAT1 | cg04843690 | Body          | OpenSea | 0.77 | 0.85 | -0.08 | 0.90 | 3.49E-06 |
| LPCAT1 | cg06661456 | Body          | OpenSea | 0.71 | 0.80 | -0.09 | 0.89 | 4.33E-05 |
| LPCAT1 | cg07151155 | Body          | OpenSea | 0.73 | 0.83 | -0.09 | 0.89 | 4.04E-06 |
| LPCAT1 | cg16658337 | Body          | S_Shore | 0.77 | 0.88 | -0.11 | 0.88 | 2.25E-04 |
| LPCAT1 | cg04005843 | 3'UTR         | N_Shore | 0.74 | 0.85 | -0.11 | 0.87 | 2.78E-05 |
| LPCAT1 | cg05365670 | TSS1500       | Island  | 0.43 | 0.49 | -0.07 | 0.86 | 1.15E-02 |
| LPCAT1 | cg07324729 | Body          | S_Shelf | 0.71 | 0.88 | -0.18 | 0.80 | 3.81E-10 |
| LPCAT1 | cg19756358 | Body          | N_Shelf | 0.27 | 0.38 | -0.11 | 0.72 | 6.47E-05 |
| LPCAT1 | cg09221037 | Body          | Island  | 0.12 | 0.17 | -0.05 | 0.68 | 7.74E-04 |
| LPCAT2 | cg01751134 | 1stExon       | Island  | 0.11 | 0.02 | 0.08  | 4.44 | 2.24E-17 |
| LPCAT2 | cg09793988 | 5'UTR;1stExon | Island  | 0.17 | 0.09 | 0.08  | 1.94 | 1.74E-17 |
| LPCAT2 | cg08416650 | 5'UTR;1stExon | Island  | 0.06 | 0.03 | 0.03  | 1.73 | 1.70E-07 |
| LPCAT2 | cg16176379 | 5'UTR;1stExon | Island  | 0.19 | 0.13 | 0.06  | 1.50 | 8.67E-05 |
| LPCAT2 | cg27458265 | 5'UTR;1stExon | Island  | 0.34 | 0.27 | 0.07  | 1.25 | 3.42E-06 |
| LPCAT2 | cg00427604 | TSS200        | N_Shore | 0.81 | 0.83 | -0.02 | 0.97 | 3.89E-03 |
| LPCAT2 | cg03736685 | Body          | S_Shelf | 0.83 | 0.93 | -0.10 | 0.89 | 1.27E-28 |
| LPCAT2 | cg00495811 | 3'UTR         | OpenSea | 0.55 | 0.78 | -0.23 | 0.71 | 1.01E-37 |
| LPCAT2 | cg07627639 | Body          | S_Shore | 0.20 | 0.34 | -0.14 | 0.58 | 1.85E-28 |
| LPCAT3 | cg07380405 | TSS1500       | S_Shore | 0.05 | 0.04 | 0.01  | 1.14 | 2.05E-05 |
| LPCAT3 | cg17842066 | Body          | N_Shore | 0.03 | 0.02 | 0.00  | 1.14 | 2.66E-03 |
| LPCAT3 | cg10044431 | Body          | OpenSea | 0.92 | 0.94 | -0.02 | 0.98 | 8.27E-10 |
| LPCAT3 | cg12063138 | Body          | OpenSea | 0.90 | 0.93 | -0.03 | 0.97 | 7.97E-09 |
| LPCAT3 | cg26651188 | Body          | OpenSea | 0.86 | 0.92 | -0.06 | 0.93 | 3.40E-27 |
| LPCAT3 | cg00294658 | TSS1500       | Island  | 0.03 | 0.04 | 0.00  | 0.92 | 2.15E-02 |
| LPCAT3 | cg01941018 | 5'UTR;1stExon | Island  | 0.14 | 0.15 | -0.01 | 0.91 | 4.25E-02 |
| LPCAT3 | cg01163066 | TSS1500       | Island  | 0.04 | 0.05 | -0.01 | 0.87 | 2.22E-05 |
| LPCAT4 | cg01853219 | Body          | N_Shore | 0.02 | 0.02 | 0.00  | 1.22 | 4.04E-02 |
| LPCAT4 | cg23441018 | Body          | N_Shelf | 0.76 | 0.80 | -0.03 | 0.96 | 6.42E-04 |
| LPCAT4 | cg16108253 | TSS1500       | Island  | 0.02 | 0.03 | 0.00  | 0.91 | 2.14E-06 |
| LPCAT4 | cg12450255 | 5'UTR;1stExon | N_Shore | 0.04 | 0.05 | 0.00  | 0.91 | 1.09E-03 |
| LPCAT4 | cg03454375 | TSS1500       | S_Shore | 0.04 | 0.04 | -0.01 | 0.87 | 9.85E-04 |

**Note:** The information was obtained from DNMIVD and SurvivalMeth databases.
